# Supplementary material for: Triphenylamine-based dicyano fluorophore for the selective detection of hydrazine vapor using cellulose acetate nanofibrous sheet
Source: Royal Society of Chemistry journal article supplement (doi:10.1039/d4ra06129b), 2024-01-01
Supplement: d4ra06129b1.pdf [file d4ra06129b1.pdf]

## Supplementary Data

### Dicyanobenzyl triphenylamine fluorophore for the selective detection of hydrazine vapor using cellulose acetate nanofibrous sheet

Boonkasem Choemvarasat<sup>a</sup>, Pipattra Mayurachayakul<sup>a</sup>, Kornkanya Pratumyot<sup>a</sup>, Mongkol Sukwattanasinitt<sup>b</sup>, Nakorn Niamnont<sup>a\*</sup>

<sup>a</sup>Supramolecular Chemistry Research Unit, Department of Chemistry, Faculty of Science, King Mongkut's University of Technology Thonburi (KMUTT), Pracha Uthit Road, Bang Mod, Thung Khru, Bangkok 10140, Thailand<sup>b</sup>

<sup>b</sup>Organic Synthesis Research Unit, Department of Chemistry, Faculty of Science and Nanotec-CU Center of Excellence on Food and Agriculture, Chulalongkorn University, Bangkok, 10330, Thailand

Email: nakorn.nia@kmutt.ac.th

#### 1. Spectroscopic data (<sup>1</sup>H and <sup>13</sup>C-NMR) and Mass spectrum.

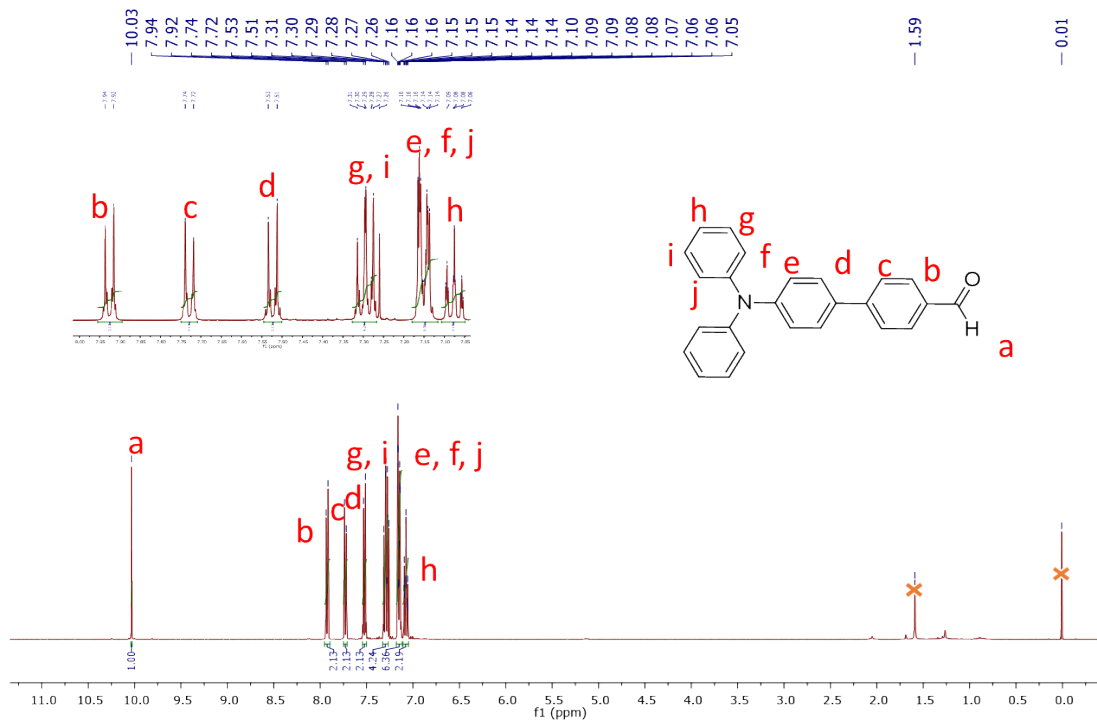

Figure S1. <sup>1</sup>H-NMR spectrum of compound **1** in CDCl<sub>3</sub>(400 MHz).

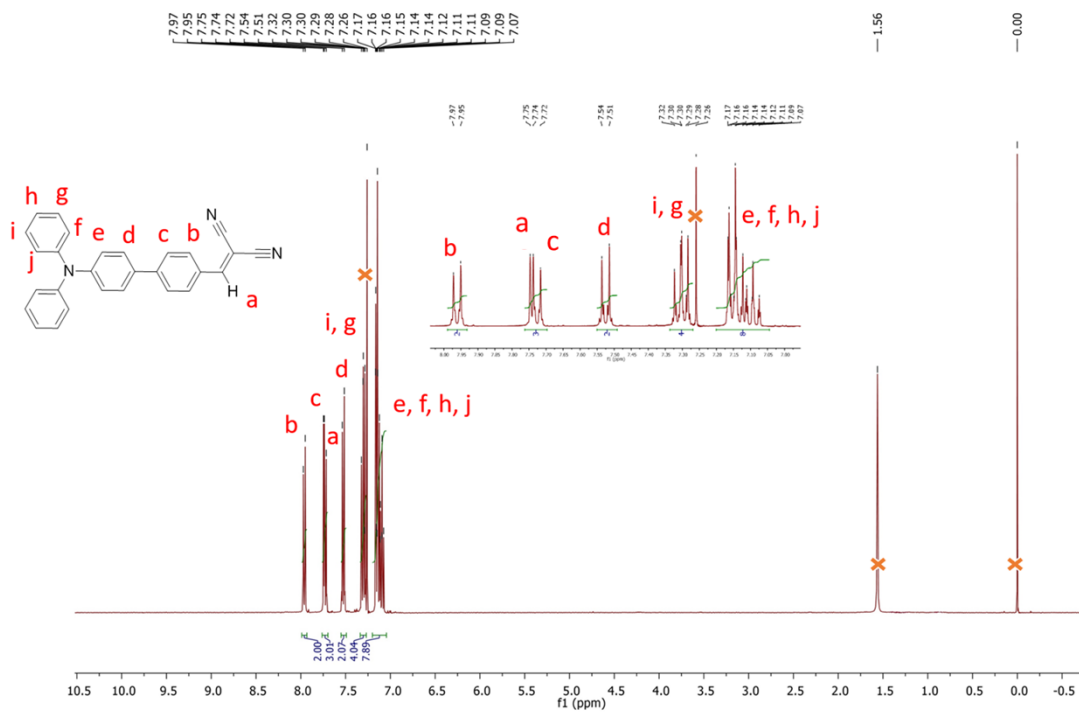

**Figure S2.**  $^1\text{H-NMR}$  spectrum of compound **2** in  $\text{CDCl}_3$  (400 MHz).

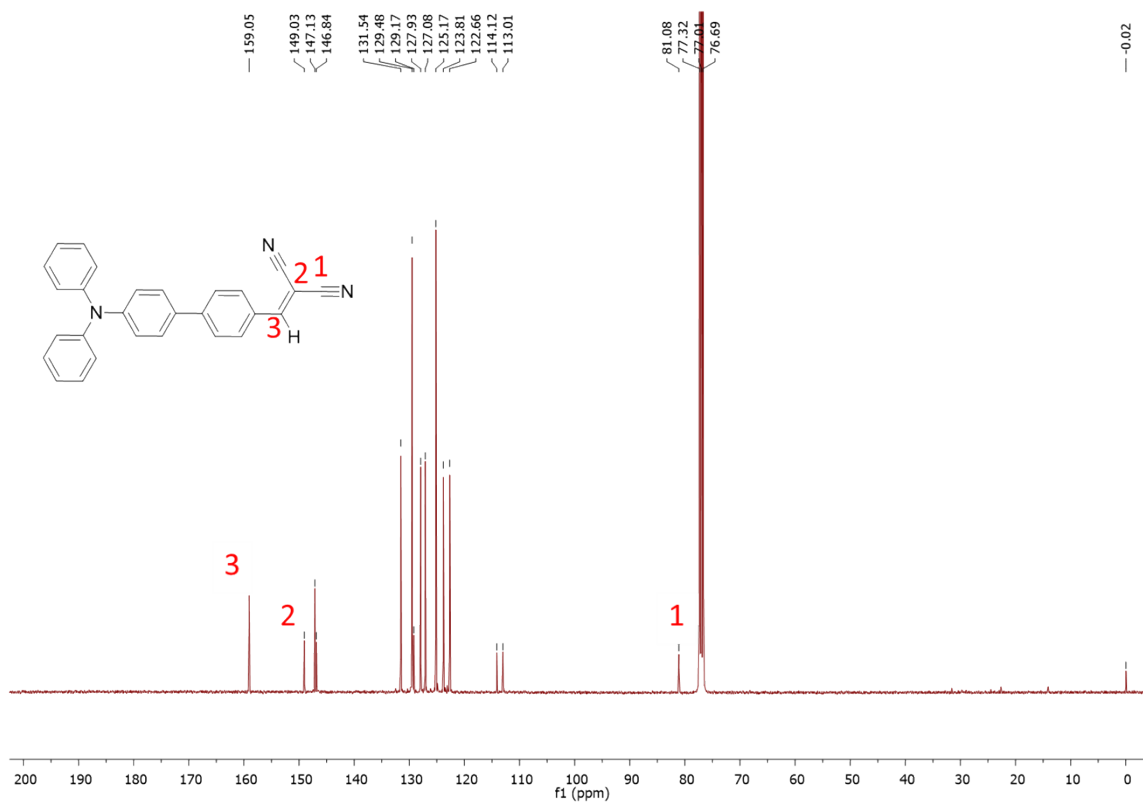

**Figure S3.**  $^{13}\text{C-NMR}$  spectrum of compound **2** in  $\text{CDCl}_3$  (100 MHz).

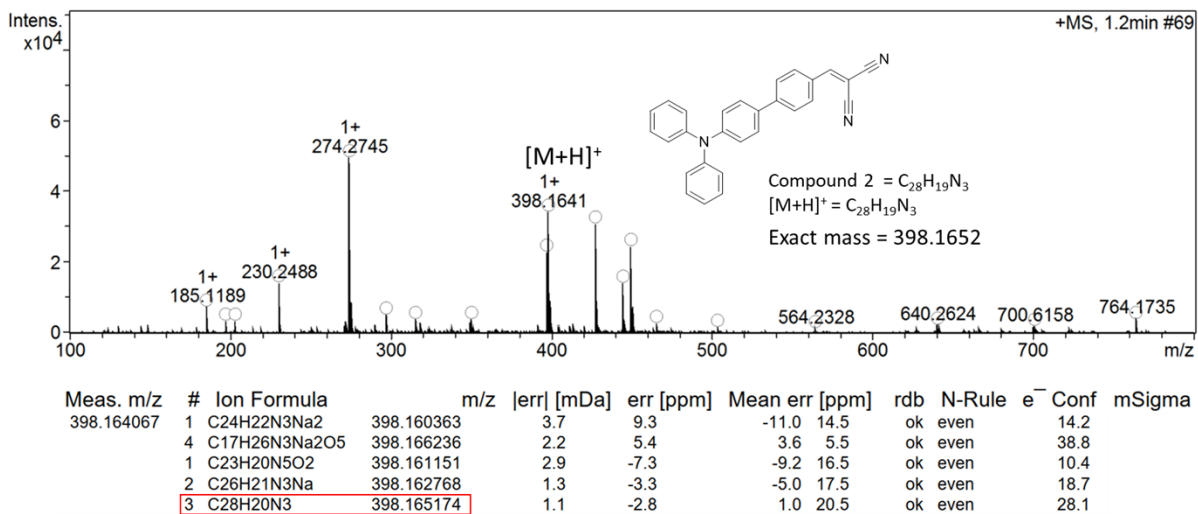

Figure S4. HRMS spectrum of compound 2.

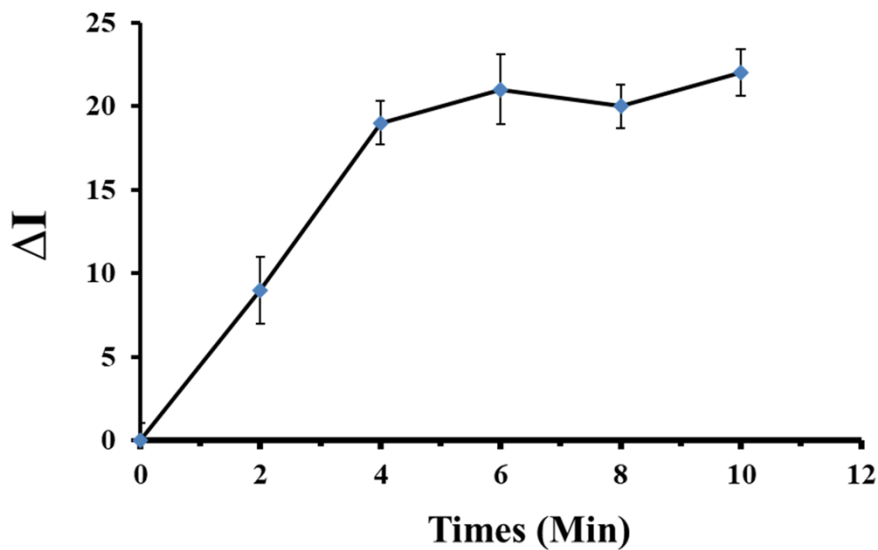

Figure S5. The time-dependent of compound 2 for hydrazine detection.

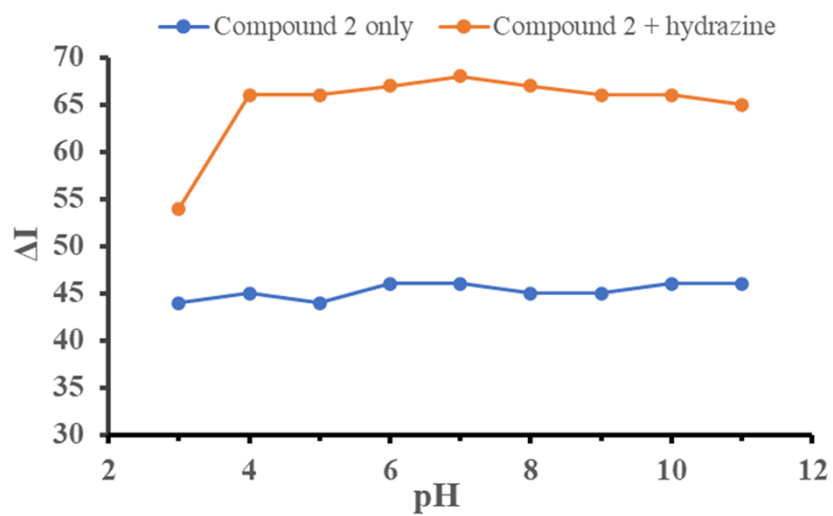

**Figure S6.** Exploring the pH range for hydrazine detection using compound 2.
